# Supplementary material
Source: PubMed Central journal article supplement (PMC10991313)
Supplement: 262_2021_3098_MOESM1_ESM.pdf [file 262_2021_3098_MOESM1_ESM.pdf]

# **Infiltration and Polarization of Tumor-associated Macrophages Predict Prognosis and Therapeutic Benefit in Muscle-Invasive Bladder Cancer**

## **Supplementary Materials**

**Supplementary Figure 1.** Patients enrollment and representative immunohistochemistry images of macrophages.

**Supplementary Figure 2.** Kaplan-Meier analyses for M2/M1 ratio according to TAMs infiltration.

**Supplementary Figure 3.** Association of immune cells with stratification based on TAMs infiltration and M2/M1 ratio.

**Supplementary Figure 4.** Correlations of molecular features with TAMs infiltration and M2/M1 ratio in TCGA and IMvigor210 trial.

**Supplementary Table 1.** Patient characteristics in ZSHS and TCGA cohort

**Supplementary Table 2.** Description of the gene signature

**Supplementary Table 3.** Immunohistochemistry (IHC) antibodies

**Supplementary Table 4.** Association of TAM-based classification and PD-L1 IC in univariate and multivariate analyses

**Supplementary Table 5.** Association of TAM-based classification and TMB in univariate and multivariate analyses

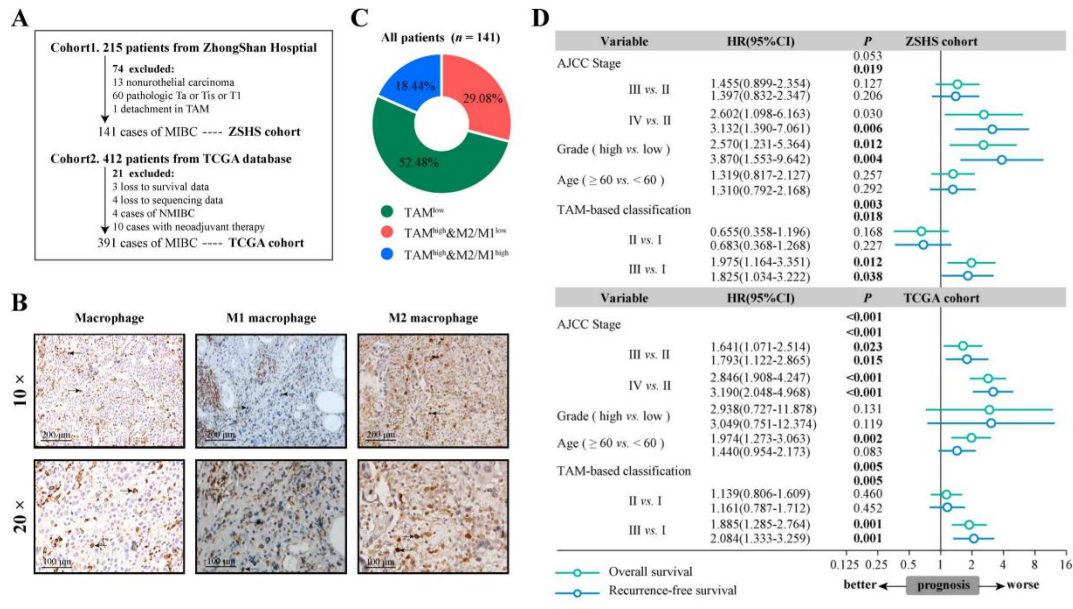

**Supplementary Figure 1. Patients enrollment and representative immunohistochemistry images of macrophages.** (A) Comprehensive information of patients enrolled in this study. (B) Representative immunohistochemistry images of TAMs (left), M1 macrophage (middle) and M2 macrophage (right). Positive cells were indicated by arrowheads. (C) Immune stratification based on TAMs infiltration and M2/M1 ratio in ZSHS cohort. (D) Univariate Cox results of clinicopathological characteristics and immune stratification based on TAMs infiltration and M2/M1 ratio in ZSHS and TCGA cohort.

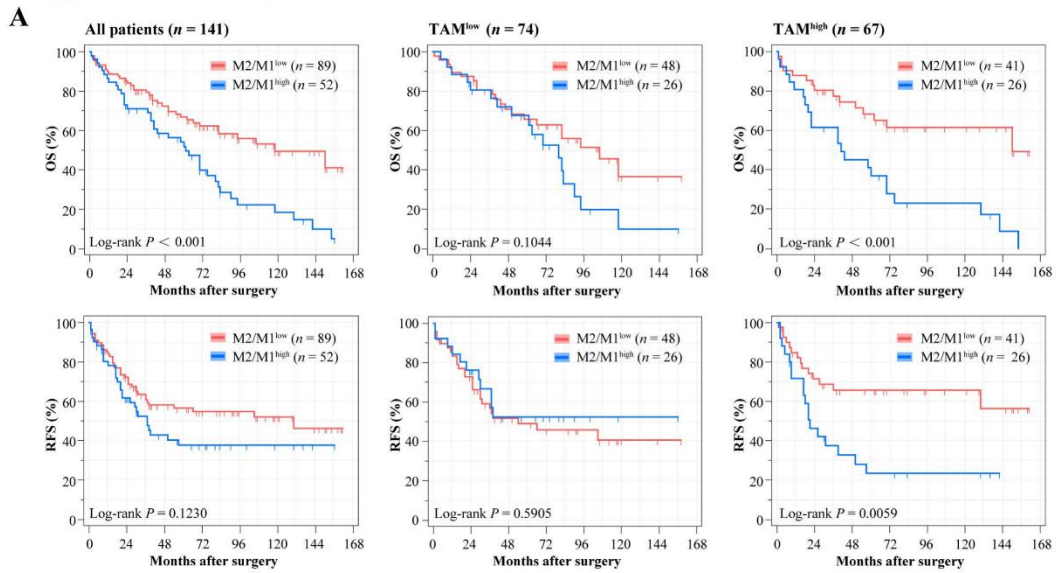

**Supplementary Figure 2. Kaplan-Meier analyses for M2/M1 ratio according to TAMs infiltration. (A)** Kaplan Meier curves analyses of OS and RFS for M2/M1 ratio according to TAM infiltration in ZSHS cohort. Data were analyzed by log-rank test.

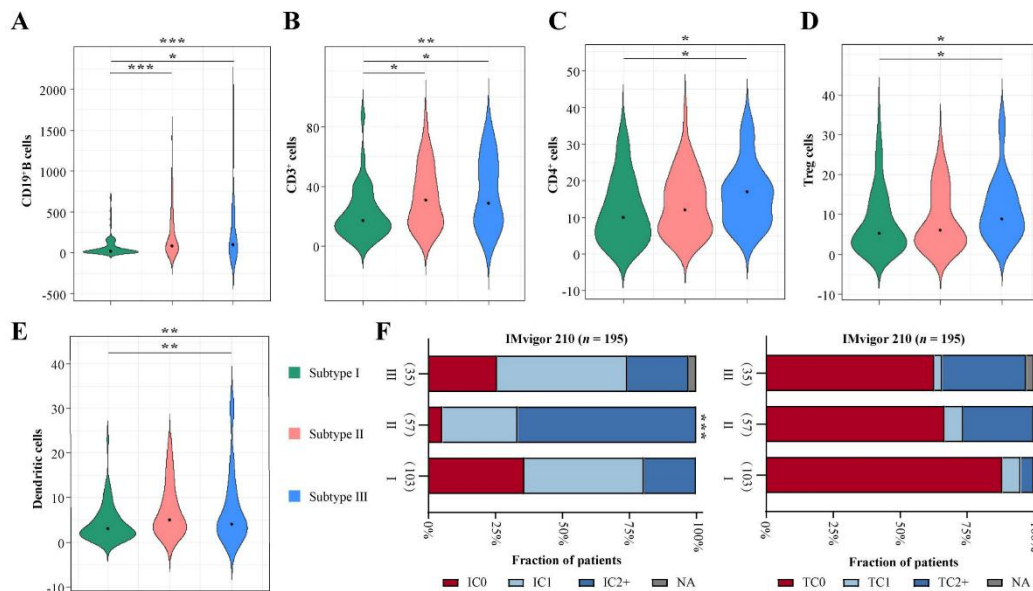

**Supplementary Figure 3. Association of immune cells with stratification based on TAMs infiltration and M2/M1 ratio.** (A-E) The association between immune stratification and immune cells infiltration assessed by IHC staining in ZSHS cohort ( $n = 141$ ). (F) Quantification analyses of TAMs infiltration and M2/M1 ratio across PD-L1 expression and distribution in IMvigor210 cohort. Data were analyzed by Kruskal-Wallis test.  $*P < 0.05$ ,  $**P < 0.01$  and  $***P < 0.001$ . IC, immune cells; TC, tumor cells.

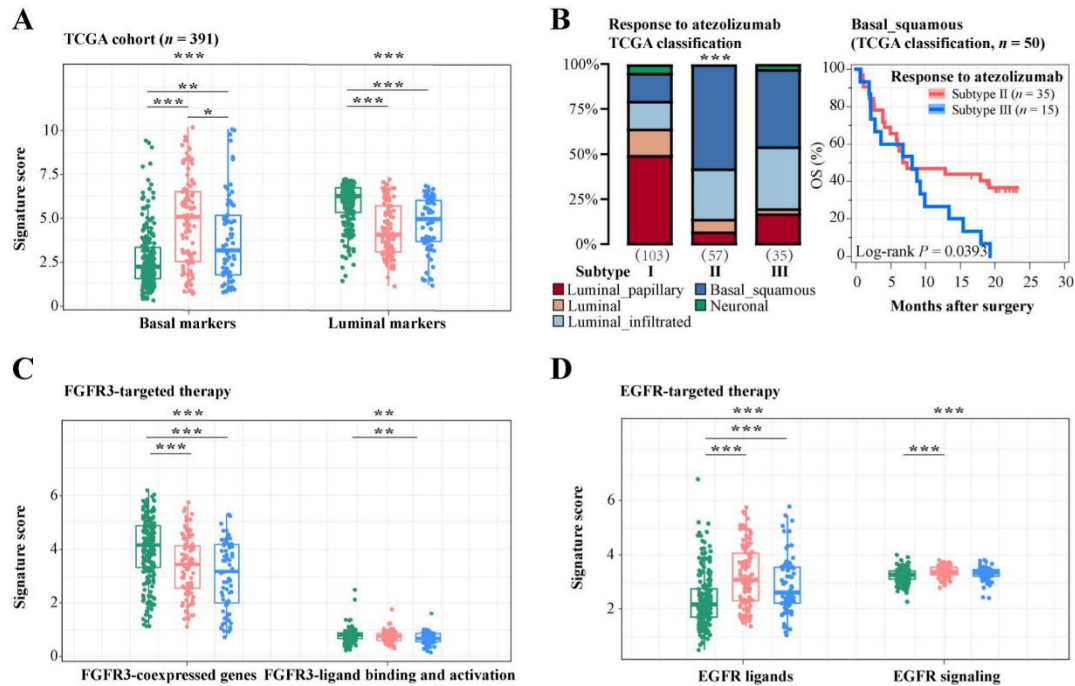

**Supplementary Figure 4. Correlations of molecular features with TAMs infiltration and M2/M1 ratio in TCGA and IMvigor210 trial.** (A) Association of luminal and basal signature score with immune stratification based on TAMs infiltration and M2/M1 ratio in TCGA cohort. (B) Quantification analyses of TAMs infiltration and M2/M1 ratio across molecular classification systems in IMvigor210 cohort (left). Kaplan Meier curves for OS stratified according to immune stratification in basal/squamous patients in IMvigor210 cohort (right). (C-D) Association of FGFR3-targeted therapies (C), and EGFR-targeted therapies (D) signature score with immune stratification based on TAMs infiltration and M2/M1 ratio. Data were analyzed by log-rank test.  $*P < 0.05$ ,  $**P < 0.01$  and  $***P < 0.001$ .

**Supplementary Table 1. Patient characteristics in ZSHS and TCGA cohort**

| Factors           | ZSHS cohort (n = 141) |      |           |            |             |              | TCGA cohort (n = 391) |      |           |            |             |                  |
|-------------------|-----------------------|------|-----------|------------|-------------|--------------|-----------------------|------|-----------|------------|-------------|------------------|
|                   | Patients              | %    | Subtype I | Subtype II | Subtype III | P*           | Patients              | %    | Subtype I | Subtype II | Subtype III | P*               |
|                   | 141                   | 100  | 74        | 41         | 26          |              | 391                   | 100  | 206       | 114        | 71          |                  |
| <b>Age (year)</b> |                       |      |           |            |             | <b>0.464</b> |                       |      |           |            |             | <b>&lt;0.001</b> |
| <60               | 52                    | 36.9 | 30        | 15         | 7           |              | 84                    | 21.5 | 60        | 17         | 7           |                  |
| ≥60               | 89                    | 63.1 | 44        | 26         | 19          |              | 307                   | 78.5 | 146       | 97         | 64          |                  |
| <b>Gender</b>     |                       |      |           |            |             | <b>0.620</b> |                       |      |           |            |             | <b>0.064</b>     |
| Male              | 117                   | 83.0 | 60        | 36         | 21          |              | 285                   | 72.9 | 160       | 75         | 50          |                  |
| Female            | 24                    | 17.0 | 14        | 5          | 5           |              | 106                   | 27.1 | 46        | 39         | 21          |                  |
| <b>Grade</b>      |                       |      |           |            |             | <b>0.052</b> |                       |      |           |            |             | <b>0.003</b>     |
| Low grade         | 24                    | 17.0 | 18        | 4          | 2           |              | 20                    | 5.1  | 19        | 1          | 0           |                  |
| High grade        | 117                   | 83.0 | 56        | 37         | 24          |              | 369                   | 94.4 | 186       | 112        | 71          |                  |
| <b>pT stage</b>   |                       |      |           |            |             | <b>0.606</b> |                       |      |           |            |             | <b>0.001</b>     |
| pT2               | 90                    | 63.8 | 51        | 25         | 14          |              | 113                   | 28.9 | 73        | 26         | 14          |                  |
| pT3               | 30                    | 21.3 | 14        | 10         | 6           |              | 189                   | 48.3 | 79        | 71         | 39          |                  |
| pT4               | 21                    | 14.9 | 9         | 6          | 6           |              | 56                    | 14.3 | 30        | 13         | 13          |                  |
| <b>pN stage</b>   |                       |      |           |            |             | <b>0.212</b> |                       |      |           |            |             | <b>0.341</b>     |
| pN0               | 133                   | 94.3 | 72        | 38         | 23          |              | 228                   | 58.3 | 122       | 69         | 37          |                  |
| pN+               | 8                     | 5.7  | 2         | 3          | 3           |              | 123                   | 31.5 | 59        | 38         | 26          |                  |
| <b>LVI</b>        |                       |      |           |            |             | <b>0.012</b> |                       |      |           |            |             | <b>0.211</b>     |
| Absent            | 52                    | 36.9 | 35        | 8          | 9           |              | 125                   | 32.0 | 71        | 35         | 19          |                  |
| Present           | 89                    | 63.1 | 39        | 33         | 17          |              | 142                   | 36.3 | 73        | 36         | 33          |                  |
| <b>AJCC stage</b> |                       |      |           |            |             | <b>0.346</b> |                       |      |           |            |             | <b>0.009</b>     |
| II                | 87                    | 61.7 | 50        | 24         | 13          |              | 125                   | 32.0 | 82        | 28         | 15          |                  |
| III               | 46                    | 32.6 | 22        | 14         | 10          |              | 137                   | 35.0 | 60        | 47         | 30          |                  |
| IV                | 8                     | 5.7  | 2         | 3          | 3           |              | 129                   | 33.0 | 64        | 39         | 26          |                  |
| <b>ACT</b>        |                       |      |           |            |             | <b>0.260</b> |                       |      |           |            |             | \                |
| Applied           | 69                    | 48.9 | 32        | 21         | 16          |              | \                     | \    | \         | \          | \           |                  |
| Not applied       | 72                    | 51.1 | 42        | 20         | 10          |              | \                     | \    | \         | \          | \           |                  |

**Abbreviations:** LVI: lymphatic vessel invasion; AJCC: American Joint Committee on Cancer; ACT: adjuvant chemotherapy (cis-platinum based therapy).

\*P value was used from Chi-square test; significant P value < 0.05 was shown in bold.

**Supplementary Table 2. Description of the gene signature**

| <b>Signature*</b>                   | <b>Genes</b>                                                                                                                                           | <b>Source</b>          |
|-------------------------------------|--------------------------------------------------------------------------------------------------------------------------------------------------------|------------------------|
| Luminal markers                     | CYP2J2, ERBB2, ERBB3, FGFR3, FOXA1, GATA3, GPX2, KRT18, KRT19, KRT20, KRT7, KRT8, PPARG, XBP1, UPK1A, UPK2                                             | PMID: 30096301         |
| Basal markers                       | CD44, CDH3, KRT1, KRT14, KRT16, KRT5, KRT6A, KRT6B, KRT6C                                                                                              | PMID: 30096301         |
| FGFR3-coexpressed genes             | FGFR3, TP63, IRS1, SEMA4B, PTPN13, TMPRSS4                                                                                                             | PMID: 22553347         |
| FGFR3-ligand binding and activation | FGF1, FGF16, FGF17, FGF18, FGF2, FGF20, FGF23, FGF4, FGF5, FGF8, FGF9, FGFR3, GALNT3                                                                   | Reactome<br>hsa190239  |
| EGFR ligands                        | EGFR, AREG, AREGB, EREG, HBEGF, TGFA                                                                                                                   | PMID: 25009231         |
| EGFR signaling                      | AREG, BTC, CBL, EGF, EGFR, EPGN, EREG, GAB1, GRB2, HBEGF, HRAS, HSP90AA1, KRAS, NRAS, PIK3CA, PIK3R1, PLCG1, RPS27A, SHC1, SOS1, TGFA, UBA52, UBB, UBC | Reactome<br>hsa1643713 |
| Immune checkpoint                   | CD274, CTLA4, HAVCR2, LAG3, PDCD1, PDCD1LG2, TIGIT                                                                                                     | PMID: 31563503         |
| Antigen presenting machinery        | B2M, HLA-A, HLA-B, HLA-C, TAP1, TAP2                                                                                                                   | PMID: 27855702         |

\*Signature score was defined as the mean of normalized expression of related genes; normalized gene expression was calculated as  $\log_2(\text{FPKM}+1)$ .

**Supplementary Table 3. Immunohistochemistry (IHC) antibodies**

| <b>Cells</b>             | <b>Antibodies information</b>                                    | <b>Diluted</b> | <b>Evaluation</b>              |
|--------------------------|------------------------------------------------------------------|----------------|--------------------------------|
| Macrophages              | Anti-CD68 antibody (Monoclonal; Rb; Abcam; ab955)                | 1:400          | Cell count (200x)              |
| M1 macrophages           | Anti-CD68 antibody (Monoclonal; Ms; DAKO; IR609)                 | Ready-to-use   | Cell count (200x)              |
|                          | Anti-HLA-DR antibody (Monoclonal; Rb; Abcam; ab2511)             | 1:250          |                                |
| M2 macrophages           | Anti-MRC1 antibody (Monoclonal; Rb; Sigma; HPA004114)            | 1:500          | Cell count (200x)              |
| NK cells                 | Anti-CD56 antibody (Monoclonal; Ms; DAKO; M7304)                 | Ready-to-use   | Cell percentage (per specimen) |
| B cells                  | Anti-CD19 antibody (Monoclonal; Ms; Abcam; ab31947)              | 1:400          | Cell count (200x)              |
| T cells                  | Anti-CD3 antibody (Monoclonal; Rb; Abcam; ab16669)               | 1:200          | Cell count (200x)              |
| CD8 <sup>+</sup> T cells | Anti-CD8 alpha antibody (Monoclonal; Ms; Abcam; ab17147)         | 1:100          | Cell count (200x)              |
| CD4 <sup>+</sup> T cells | Anti-CD4 antibody (Monoclonal; Ms; Abcam; ab67001)               | 1:50           | Cell count (200x)              |
| Th1 cells                | Anti-CD4 antibody (Monoclonal; Ms; Abcam; ab67001)               | 1:50           | Cell count (per specimen)      |
|                          | Anti-T-bet antibody (Monoclonal; Rb; Abcam; ab150440)            | 1:500          |                                |
| Th2 cells                | Anti-CD4 antibody (Monoclonal; Ms; Abcam; ab67001)               | 1:50           | Cell count (per specimen)      |
|                          | Anti-GATA3 antibody (Monoclonal; Rb; Abcam; ab186371)            | 1:100          |                                |
| Treg cells               | Anti-FOXP3 antibody (Monoclonal; Ms; Abcam; ab22510)             | 1:100          | Cell count (200x)              |
| Mast cells               | Anti-Mast Cell Tryptase antibody (Monoclonal; Ms; Abcam; ab2378) | 1:10000        | Cell count (per specimen)      |
| Neutrophils              | Anti-CD66b antibody (Polyclonal; Rb; Abcam; ab197678)            | 1:1000         | Cell count (per specimen)      |
| Dendritic cells          | Anti-HLA-DR antibody (Monoclonal; Ms; Abcam; ab20181)            | 1:200          | Cell count (200x)              |
|                          | Anti-CD11c antibody (Monoclonal; Rb; Abcam; ab52632)             | 1:200          |                                |
| PD-1                     | Anti-PD1 antibody (Monoclonal; Ms; Abcam; ab52587)               | 1:100          | Cell count (200x)              |
| PD-L1                    | Anti-PD-L1 antibody (Monoclonal; Rb; Abcam; ab228415)            | 1:500          | Cell count (200x)              |
| CTLA-4                   | Anti-CTLA-4 antibody (Monoclonal; Ms; Santa-Cruz; sc-376016)     | 1:100          | Cell count (200x)              |
| TIM-3                    | Anti-TIM 3 antibody (Polyclonal; Rb; Abcam; ab185703)            | 1:100          | Cell count (200x)              |
| LAG-3                    | Anti-LAG-3 antibody (Monoclonal; Rb; Abcam; ab209236)            | 1:500          | Cell count (200x)              |
| TIGIT                    | Anti-TIGIT antibody (Monoclonal; Rb; Abcam; ab243903)            | 1:100          | Cell count (200x)              |
| GZMB                     | Anti-Granzyme B antibody (Monoclonal; Rb; Abcam; ab4059)         | 1:200          | Cell count (200x)              |
| PRF-1                    | Anti-Perforin antibody (Monoclonal; Ms; Abcam; ab75573)          | Ready-to-use   | Cell count (200x)              |
| IFN- $\gamma$            | Anti-Interferon gamma antibody (Monoclonal; Rb; Abcam; Ab9657)   | 1:300          | Cell count (200x)              |
| IL-10                    | Anti-IL-10 antibody (Monoclonal; Ms; Abcam; ab134742)            | 1:200          | Cell count (200x)              |
| TGF- $\beta$             | Anti-LAP antibody (Polyclonal; Go; R&D; AB-246-NA)               | 1:100          | Cell count (200x)              |



**Supplementary Table 4. Association of TAM-based classification and PD-L1 IC in univariate and multivariate analyses**

| Cox regression analyses<br>(n = 195) | Univariate |             |              | Multivariate |             |              |
|--------------------------------------|------------|-------------|--------------|--------------|-------------|--------------|
|                                      | HR         | 95%CI       | <i>P</i> *   | HR           | 95%CI       | <i>P</i> *   |
| IC level                             |            |             | <b>0.005</b> |              |             | 0.088        |
| IC1 vs. IC0                          | 0.953      | 0.629-1.445 | 0.821        | 0.962        | 0.627-1.477 | 0.859        |
| IC2+ vs. IC0                         | 0.508      | 0.319-0.809 | <b>0.004</b> | 0.610        | 0.367-1.011 | 0.055        |
| TAM-based classification             |            |             | <b>0.001</b> |              |             | <b>0.007</b> |
| II vs. I                             | 0.587      | 0.378-0.912 | <b>0.018</b> | 0.713        | 0.441-1.154 | 0.168        |
| III vs. I                            | 1.555      | 1.020-2.370 | <b>0.040</b> | 1.649        | 1.074-2.532 | <b>0.022</b> |

**Abbreviations:** IC: immune cells.

\*Significant *P* value < 0.05 was shown in bold.

**Supplementary Table 5. Association of TAM-based classification and TMB in univariate and multivariate analyses**

| Cox regression analyses<br>(n = 195) | Univariate |             |              | Multivariate |             |              |
|--------------------------------------|------------|-------------|--------------|--------------|-------------|--------------|
|                                      | HR         | 95%CI       | <i>P</i> *   | HR           | 95%CI       | <i>P</i> *   |
| TMB (high vs. low)                   | 0.512      | 0.337-0.777 | <b>0.002</b> | 0.571        | 0.371-0.878 | <b>0.011</b> |
| TAM-based classification             |            |             | <b>0.001</b> |              |             | 0.064        |
| II vs. I                             | 0.587      | 0.378-0.912 | <b>0.018</b> | 0.713        | 0.440-1.154 | 0.168        |
| III vs. I                            | 1.555      | 1.020-2.370 | <b>0.040</b> | 1.486        | 0.880-2.511 | 0.139        |

**Abbreviations:** TMB: tumor mutation burden.

\*Significant *P* value < 0.05 was shown in bold.
